# Supplementary material
Source: publisher figshare collection journal article supplement (https://gsajournals.figshare.com/articles/dataset/_/7822523)

**Figure S3: Comparison of psh colonies produced via streaking and pinning for a selection of environmental strains.**

First three columns: For each of the assayed strains, colonies from YPD plates were streaked onto SLAD, SLAD + PheOH, and SLAD + TrpOH plates, and incubated at 30C for 5 days before imaging. Scale bars represent 1 mm; variation in colony size represents both strain variation and density of growth in the streaks. To facilitate comparison to the larger data set, the numbers indicate the average filamentous index for a given strain x treatment combination from the high throughput assay. Fourth column: Images from a single SLAD Omnitray.

SLAD

+ PheOH

+ TrpOH

Well/ YJM strain #  
Genetic background  
Avg. filamentous index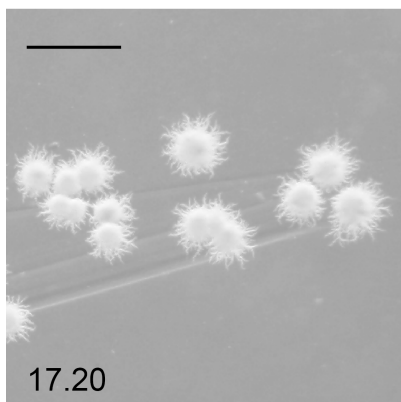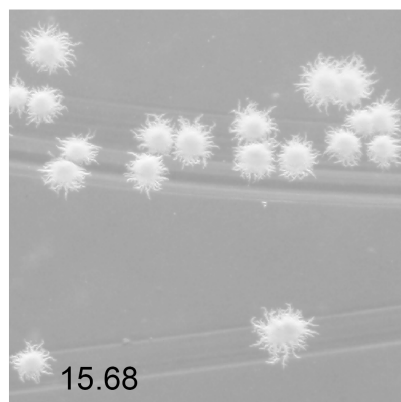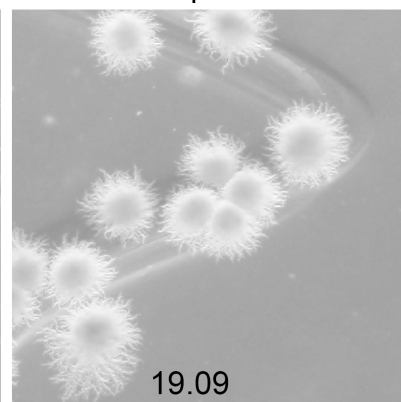A2/ YJM189  
NCYC 431  
17.32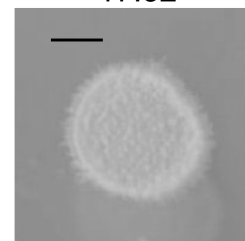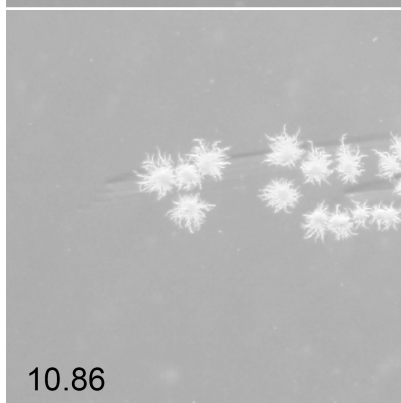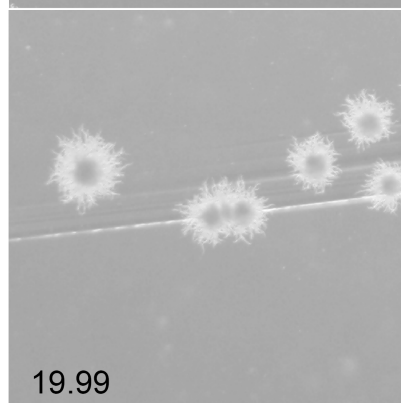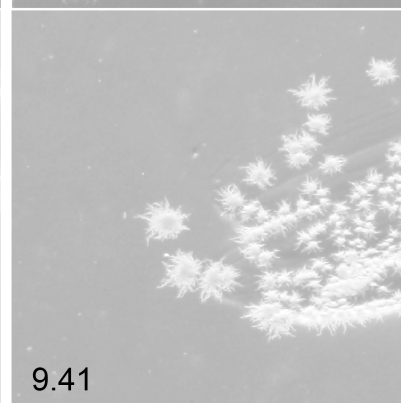A9/ YJM320  
91-190  
13.42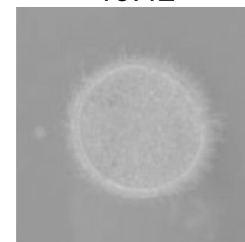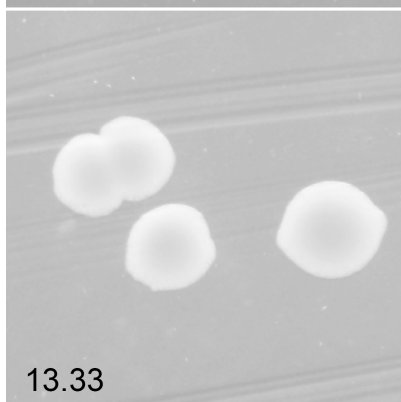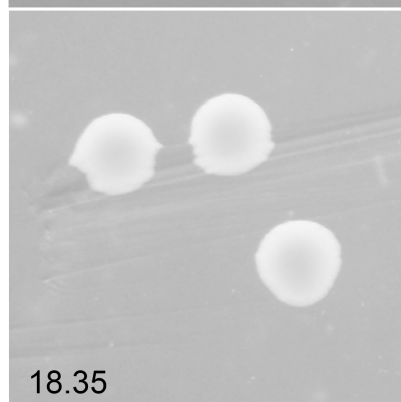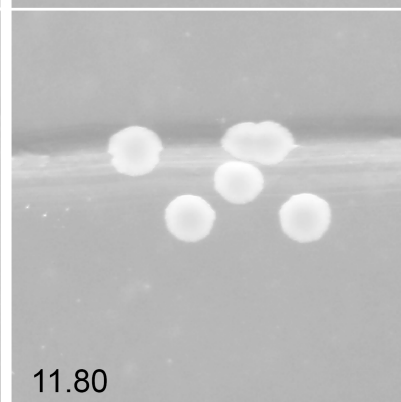D1/ YJM1078  
NRRL YB-4348  
14.50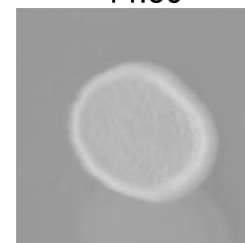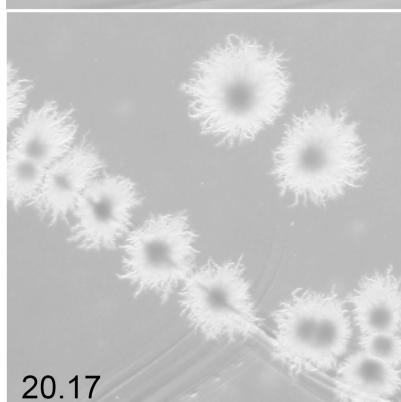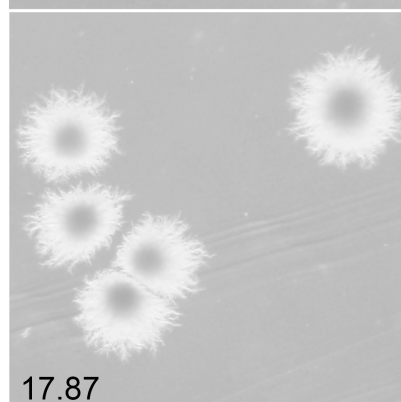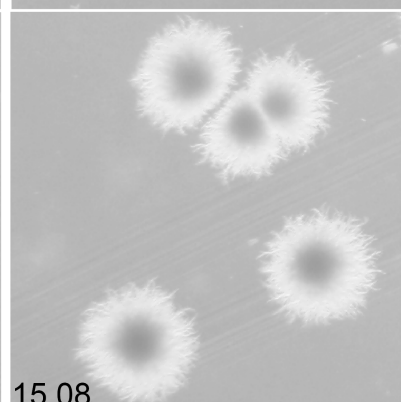D10/ YJM1244  
NRRL Y-1532  
17.71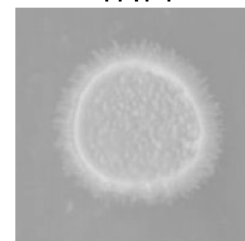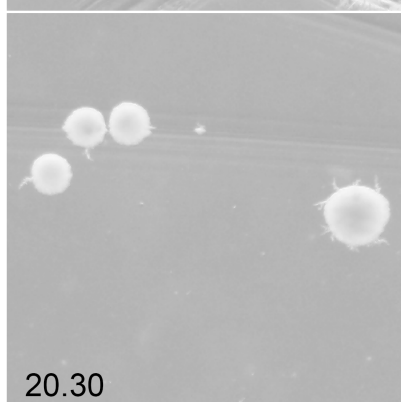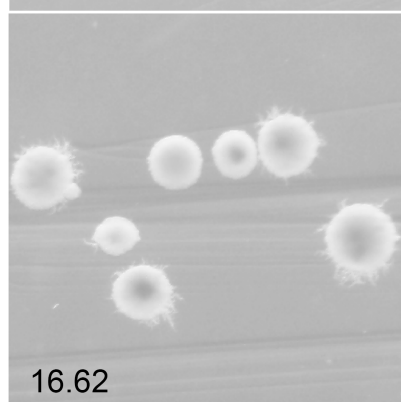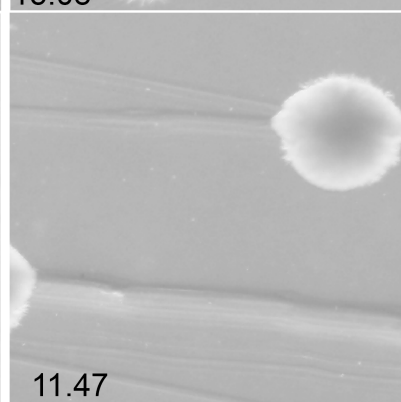D11/ YJM1248  
NRRL Y-1546  
16.13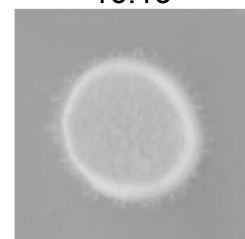

SLAD

+ PheOH

+ TrpOH

Well/ YJM strain #  
Genetic background  
Avg. filamentous index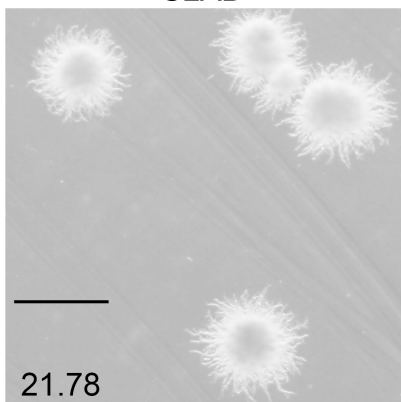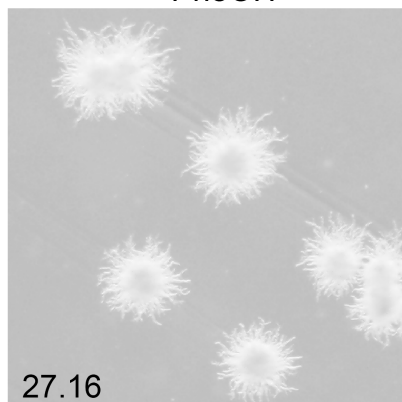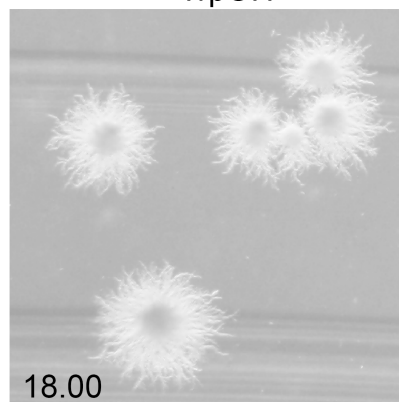F1/ YJM1341  
NRRL Y-1263  
22.31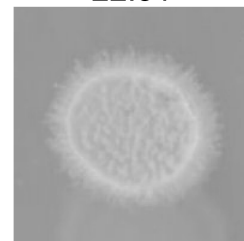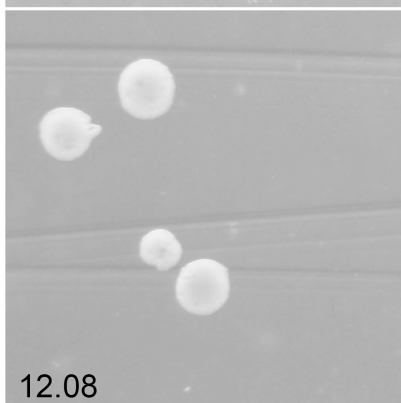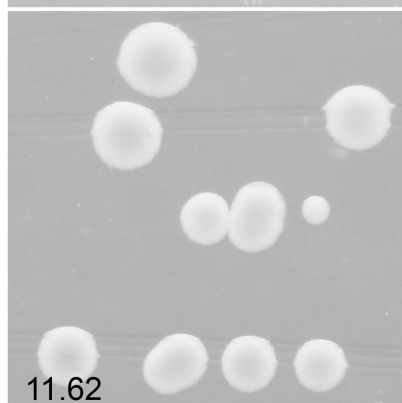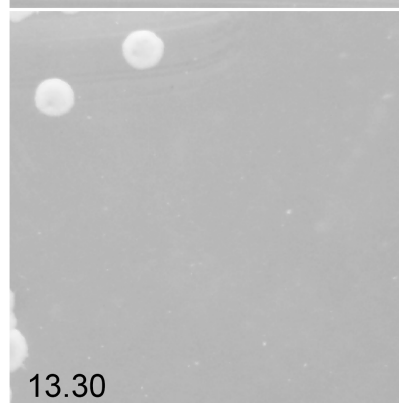G11/ YJM1443  
UWOPS83-787.3  
12.34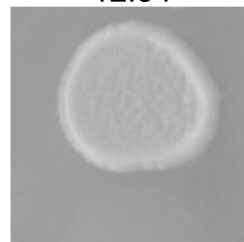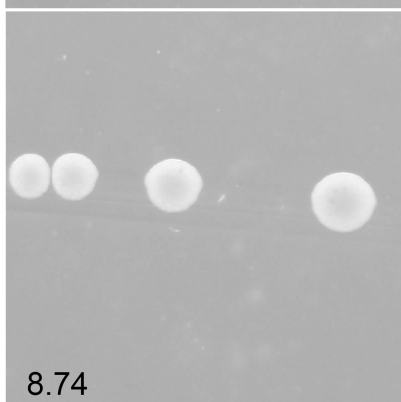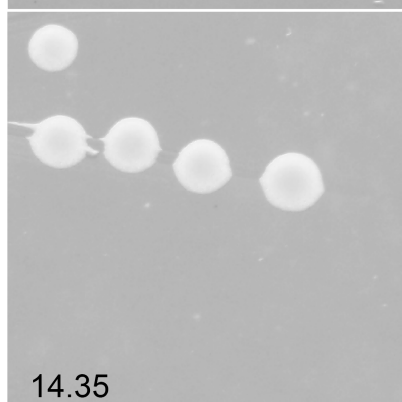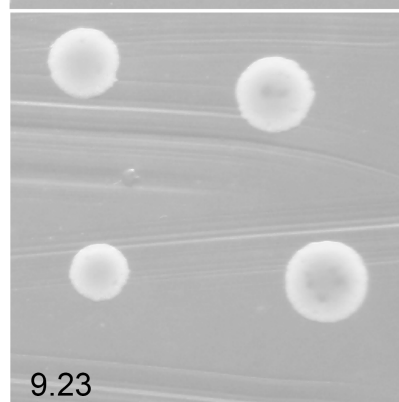G12/ YJM1444  
UWOPS87-2421  
10.78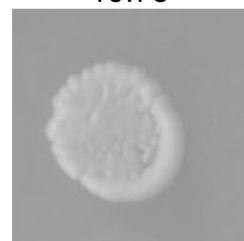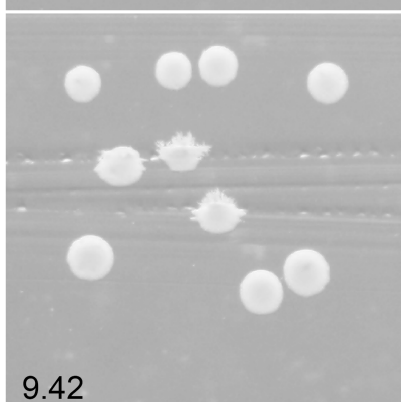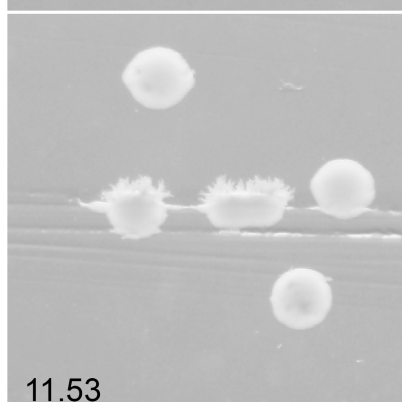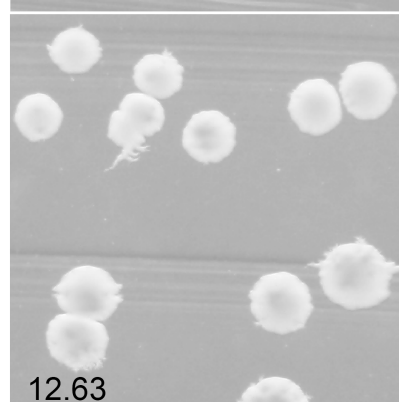H3/ YJM1460  
Y12  
11.19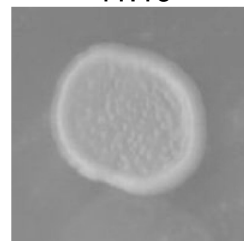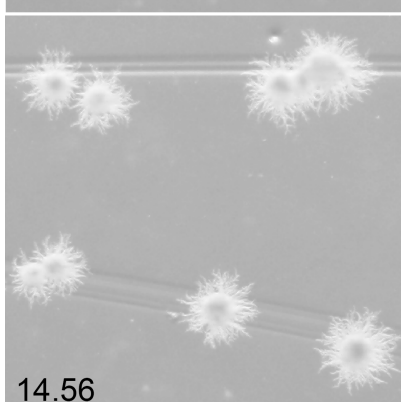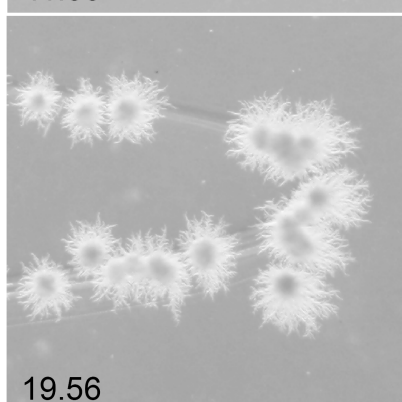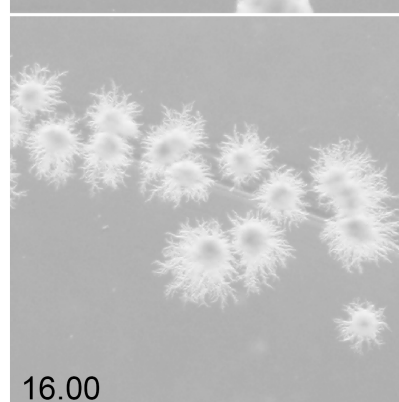H5/ YJM1477  
NRRL Y-581  
16.70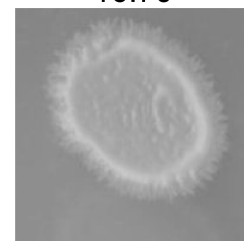

Supplement: Supplementary file 1 [file 1 › FigureS3.pdf]
