# Supplementary material
Source: publisher figshare collection journal article supplement (https://gsajournals.figshare.com/articles/dataset/_/7822523)
Supplement: Supplementary file 1 [file 1]

Archive with 8 entries (8 files):
- Eclipse.py
- TableS2.csv
- TableS1.csv
- FigureS4.pdf
- FigureS3.pdf
- FigureS2.pdf
- FigureS1.pdf
- FIleS1.pdf
