# Supplementary material
Source: publisher figshare collection journal article supplement (https://gsajournals.figshare.com/articles/dataset/_/7822523)
Supplement: Supplementary file 1 [file 1 › Eclipse.py]

#This program was written by Adam Lenhart in Fall 2017. 
#The purpose is to estimate the amount of filamentous growth surrounding a colony.
#The file takes RGB images and the user must determine appropriate cut-off values.
#It can easily be altered to loop through all the images in a directory and output all the values to a file. 

import skimage
import os
from skimage import io
import math

#finds the image file; each user should put in the address of the file
image = 'filename.jpg'

#Set the values for the color thresholds; each user should choose their own.
white_threshold = 164
R_cutoff = 154
G_cutoff = 141
B_cutoff = 150

#gives file to skimage and names the data from the image "colony".
colony = io.imread(image)
print colony.size

#x and y coordinates in the image
i = 0
j = 0 

#list of the coordinates for all the white pixels
ring = []
#list of all the x- coordinates for the white pixels
ring2 = []
#list of all the y- coordinates for the white pixels
ring3 = []


#This sets the ring, and turns it white. It loops through every pixel in the image, finds the RGB values, 
#and asks if they are white, gray, or background: 
for i in range(len(colony)):
    for j in range(len(colony[i])):
		#Get R, G, B values: in skimage, the [0] of i,j is R, the [1] of i,j is G, the [2] of i,j is B.
		#If pixel is greater than the white threshold, then set to white:
        if colony[i][j][0] > white_threshold and colony[i][j][1]> white_threshold and colony[i][j][2]> white_threshold:
			#Set the RGB values of the pixel to 255 (white)      
            colony[i][j][0] = 255
            colony[i][j][1] = 255
            colony[i][j][2] = 255

            #Write the address of the pixel to the rings
            ring.append(colony[i][j])
            ring2.append(i)
            ring3.append(j)
					
		#Get R, G, B values and if greater than the specifed values, then make background (black):
        elif colony[i][j][0] < R_cutoff and colony[i][j][1]< G_cutoff and colony[i][j][2]< B_cutoff:
      

            colony[i][j][0] = 0
            colony[i][j][1] = 0
            colony[i][j][2] = 0
            
            background = ["agar pixels"]
            background.append(colony[i][j])
			
       	#If not black or white, then set as gray (presumably in the colony or filamentous area)
        else:
            colony[i][j][0] = 128
            colony[i][j][1] = 128
            colony[i][j][2] = 128

            totalcolony = ["all colony pixels"]
            totalcolony.append([colony[i][j]])

#Write out image with pixels defined; each user should name the file. 
skimage.io.imsave('filename_int.jpg', colony)


#find pixel in ring with highest and lowest j value.
maximum_j = max(ring3)
minimum_j = min(ring3)

#finds pixel in ring with highest and lowest i value. 
maximum_i = max(ring2)
minimum_i = min(ring2)

#use midpoint formula and min/max values to find
#approximate center of the ellipse, axises and avg radius
centerj = (maximum_j + minimum_j) / 2
centeri = (maximum_i + minimum_i) / 2
i_axis = (maximum_i - minimum_i) /2
j_axis = (maximum_j - minimum_j) /2
avg_radius = (i_axis + j_axis) / 2

#define which pixels are in colony and which are around it
center= []
outer = []
for i in range(len(colony)):
    for j in range(len(colony[i])):
        # uses formula for an ellipse plus the midpoints to define the colony perimeter, and place pixels
        #within this perimeter as red, and part of the array center
        if ((j-centerj)**2)/(j_axis**2/avg_radius)+ ((i-centeri)**2)/(i_axis**2/avg_radius) < avg_radius:
            colony[i][j][0] = 255
            colony[i][j][1] = 0
            colony[i][j][2] = 0
            point = []
            point.append(i)
            point.append(j)
            center.append(point)
            #finds white colonies (those in the ring) and places them in the center array
        elif colony[i][j][0] == 255 and colony[i][j][1] == 255 and colony[i][j][2] == 255:
            point2 = []
            point2.append(i)
            point2.append(j)
            center.append(point2)
            #finds remaining gray pixels and places them in the outer array
        elif colony[i][j][0] == 128 and colony[i][j][1] == 128 and colony[i][j][2] == 128:
            point3 = []
            point3.append(i)
            point3.append(j)
            outer.append(point3)
#Write out image with inner pixels eclipsed; each user should name the file. 
skimage.io.imsave('filename_final.jpg', colony)

# compares the ratio of pixels outside the colony to those within, defined as the variable Social growth
print "center pixels, outerpixels" , len(center) , "," , len(outer)
socialgrowth = (100 * len(outer) / len(center))
print "social growth__%" , socialgrowth
