# Supplementary material
Source: publisher figshare collection journal article supplement (https://gsajournals.figshare.com/articles/dataset/_/7822523)

**Figure S2:** Psh for the 100-genomes panel. (A) Average filamentous index for individual strains ( $\pm 2$  s.e.m.) ordered based on their filamentous index. (B) Means for the niches.

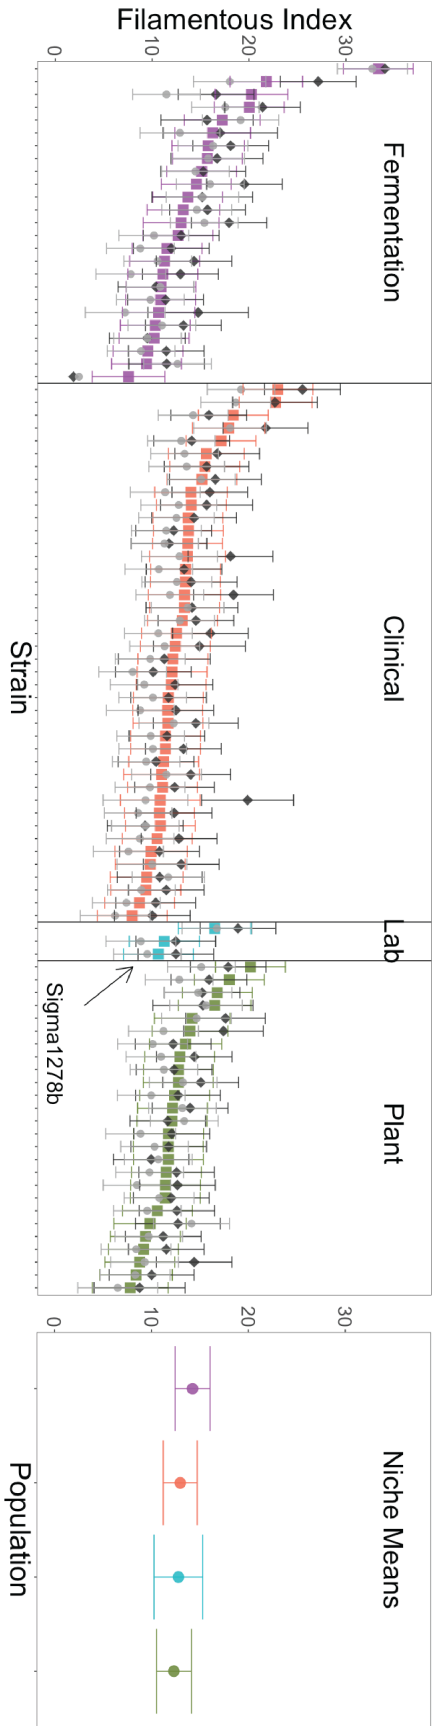

Supplement: Supplementary file 1 [file 1 › FigureS2.pdf]
