# Supplementary material
Source: publisher figshare collection journal article supplement (https://gsajournals.figshare.com/articles/dataset/_/7822523)
Supplement: Supplementary file 1 [file 1 › FigureS4.pdf]

**Figure S4: Comparison of psh colonies produced via streaking and pinning for Sigma1278b.** A single colony from a YPD plate was streaked onto SLAD, SLAD + PheOH, and SLAD + TrpOH plates, and incubated at 30C for 5 days before imaging; scale bar represent 1 mm. Bottom row contains images of pinned colonies from OmniTrays with the same medium.

Sigma1278b (YJM1290)

Control

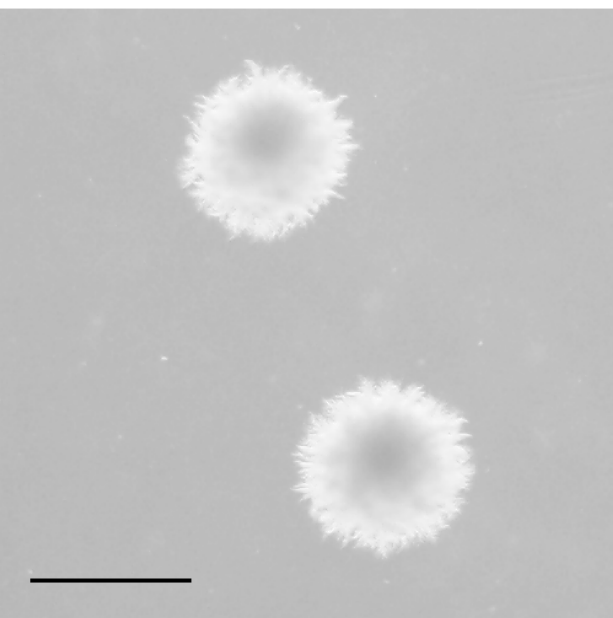

PheOH

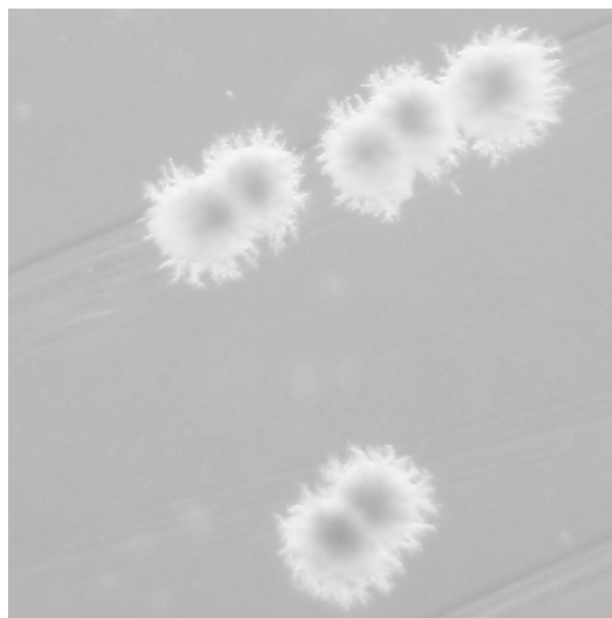

TrpOH

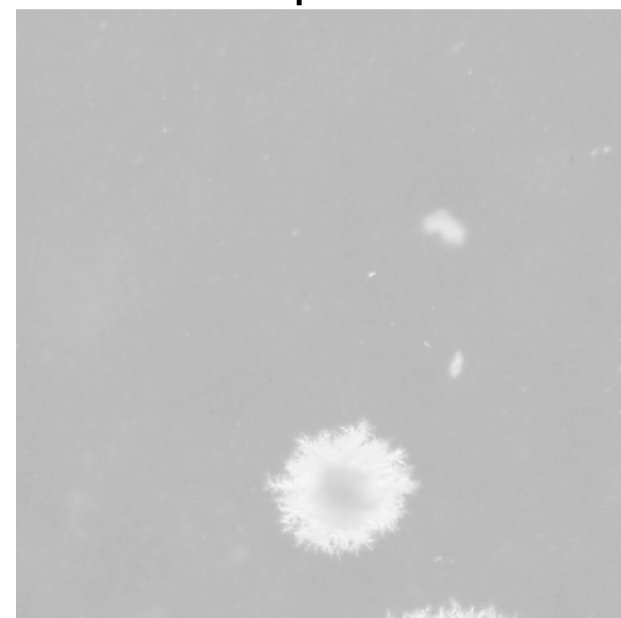

streaked colonies

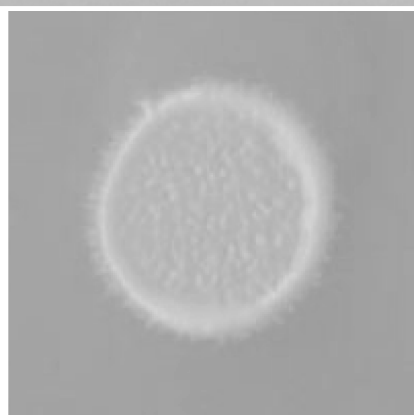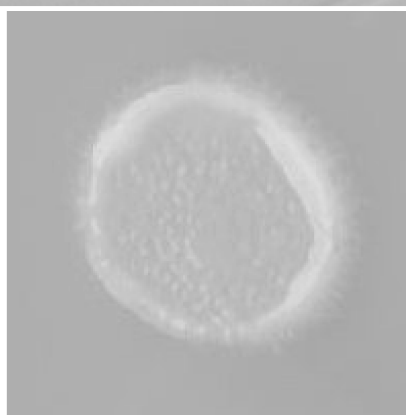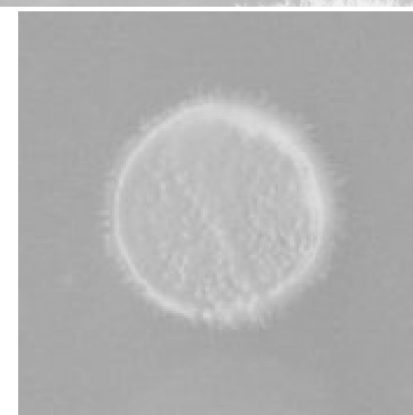

pinned colonies
